1 **Stromal HIF2 Regulates Immune Suppression in the Pancreatic Cancer**  
2 **Microenvironment**

3 Yanqing Huang<sup>1,\*</sup>, Carolina J. Garcia Garcia<sup>1,2,\*</sup>, Daniel Lin<sup>1</sup>, Nicholas D.  
4 Nguyen<sup>1</sup>, Tara N. Fujimoto<sup>1</sup>, Jun Zhao<sup>3</sup>, Jaewon J. Lee<sup>4</sup>, Vincent Bernard<sup>2,4</sup>,  
5 Meifang Yu<sup>1</sup>, Abigail M. Delahoussaye<sup>1</sup>, Jae L. Phan<sup>1</sup>, Amit Deorukhkar<sup>1</sup>,  
6 Jessica M. Molkenkine<sup>1</sup>, Natividad R. Fuentes<sup>1</sup>, Madeleine C. Turner<sup>1</sup>, Dieter  
7 Saur<sup>5</sup>, Anirban Maitra<sup>4</sup>, Cullen M. Taniguchi<sup>1,6,#</sup>

8

9 <sup>1</sup>Department of Experimental Radiation Oncology, The University of Texas MD  
10 Anderson Cancer Center, Houston, TX 77030, USA.

11 <sup>2</sup>The University of Texas MD Anderson Cancer Center UTHealth Graduate  
12 School of Biomedical Sciences, Houston, TX 77030, USA.

13 <sup>3</sup>Department of Translational Molecular Pathology, The University of Texas MD  
14 Anderson Cancer Center, Houston, TX 77030, USA.

15 <sup>4</sup>Department of Pathology, The University of Texas MD Anderson Cancer Center,  
16 Houston, TX 77030, USA.

17 <sup>5</sup>Division of Translational Cancer Research, German Cancer Research Center  
18 and German Cancer Consortium, Heidelberg 69120, Germany.

19 <sup>6</sup>Department of Radiation Oncology, The University of Texas MD Anderson  
20 Cancer Center, Houston, TX 77030, USA.

21

22 \*Authors share co-first authorship.

23 †To whom correspondence should be addressed:

24 Cullen M. Taniguchi, MD, PhD  
25 The University of Texas MD Anderson Cancer Center  
26 Division of Radiation Oncology  
27 1515 Holcombe Blvd., Unit 1050  
28 Houston, TX 77030-4000  
29 T: 713-745-5269  
30 [ctaniguchi@mdanderson.org](mailto:ctaniguchi@mdanderson.org)

31

32 **Data & Resource Sharing:** Data, materials, and reagents will be made available  
33 to other researchers upon request.

34 **Abstract**

35 *Background & Aims.* Pancreatic ductal adenocarcinoma (PDAC) has a hypoxic,  
36 immunosuppressive stroma, which contributes to its resistance to immune  
37 checkpoint blockade therapies. The hypoxia-inducible factors (HIFs) mediate the  
38 cellular response to hypoxia, but their role within the PDAC tumor  
39 microenvironment remains unknown.

40  
41 *Methods.* We used a dual recombinase mouse model to delete *Hif1 $\alpha$*  or *Hif2 $\alpha$*  in  
42  $\alpha$ -smooth muscle actin ( $\alpha$ SMA)-expressing cancer-associated fibroblasts (CAFs)  
43 arising within spontaneous pancreatic tumors. The effects of CAF-*Hif2 $\alpha$*   
44 expression on tumor progression and composition of the tumor microenvironment  
45 were evaluated by Kaplan-Meier analysis, quantitative real-time polymerase  
46 chain reaction, histology, immunostaining, and by both bulk and single-cell RNA  
47 sequencing. CAF-macrophage crosstalk was modeled *ex vivo* using conditioned  
48 media from CAFs after treatment with hypoxia and PT2399, a HIF2 inhibitor  
49 currently in clinical trials. Syngeneic flank and orthotopic PDAC models were  
50 used to assess whether HIF2 inhibition improves response to immune checkpoint  
51 blockade.

52  
53 *Results.* CAF-specific deletion of HIF2, but not HIF1, suppressed PDAC tumor  
54 progression and growth, and improved survival of mice by 50% (n = 21-23  
55 mice/group, Log-rank  $P = 0.0009$ ). Deletion of CAF-HIF2 modestly reduced  
56 tumor fibrosis and significantly decreased the intratumoral recruitment of  
57 immunosuppressive M2 macrophages and regulatory T cells. Treatment with the  
58 clinical HIF2 inhibitor PT2399 significantly reduced *in vitro* macrophage  
59 chemotaxis and M2 polarization, and improved tumor responses to  
60 immunotherapy in both syngeneic PDAC mouse models.

61  
62 *Conclusions.* Together, these data suggest that stromal HIF2 is an essential  
63 component of PDAC pathobiology and is a druggable therapeutic target that

64 could relieve tumor microenvironment immunosuppression and enhance immune  
65 responses in this disease.

66

67 **Keywords:** pancreatic ductal adenocarcinoma; hypoxia; cancer-associated  
68 fibroblasts; tumor-associated macrophages

## 69 **Introduction**

70 Pancreatic ductal adenocarcinoma (PDAC) responds poorly to most  
71 cancer treatments, including immunotherapy<sup>1</sup>. This therapeutic recalcitrance may  
72 stem from PDAC's extensive desmoplastic stroma, which suppresses anti-tumor  
73 immunity<sup>2</sup> and increases intratumoral pressure<sup>3</sup>, resulting in severe hypoxia<sup>4</sup> and  
74 impaired drug delivery<sup>5</sup>. Cancer-associated fibroblasts (CAFs) are the main  
75 components and producers of stroma in PDAC<sup>6</sup>. Efforts to physically disrupt the  
76 hypoxic stromal component through Sonic hedgehog protein inhibition<sup>7</sup>, selective  
77 fibroblast depletion<sup>8</sup>, or recombinant human hyaluronidase<sup>9</sup> have effectively  
78 lowered stromal content but paradoxically led to worse outcomes in both  
79 preclinical studies and clinical trials. These data argue that the initially promising  
80 strategy of physically ablating the PDAC stroma may be clinically  
81 counterproductive, warranting a different approach.

82 The hypoxia-inducible factors 1 (HIF1) and 2 (HIF2) are stabilized in low  
83 oxygen and have been hypothesized to mediate therapeutic resistance<sup>10</sup> and  
84 aggressive growth of PDAC<sup>11</sup>. Deletion of HIF1<sup>12</sup> or HIF2<sup>13</sup> in the pancreatic  
85 epithelial compartment failed to change overall survival in mice with spontaneous  
86 PDAC. However, the function of HIFs in other prominent compartments of the  
87 pancreatic tumor microenvironment (TME) remains unclear. Given the  
88 importance of the tumor stroma in PDAC oncobiology, we investigated the role of  
89 HIF signaling in CAFs and its impact on the PDAC TME.

90 Here, we elucidated the function of the HIFs within the PDAC stroma  
91 using a dual recombinase model to spatiotemporally alter HIF1 or HIF2 signaling  
92 only in activated fibroblasts reprogrammed within spontaneous murine pancreatic  
93 tumors (also known as CAFs). We found that CAF-specific deletion of HIF2, but  
94 not HIF1, improved survival from pancreatic cancer by reducing the recruitment  
95 of immunosuppressive macrophages. We further showed that therapeutic HIF2  
96 inhibition improved responses to immune checkpoint blockade, indicating this is a  
97 potential combinatorial therapeutic strategy for PDAC.

98

## 99 **Materials and Methods**

## 100 Mice

101 All experimental mouse work adhered to the standards articulated in the  
102 Animal Research: Reporting of *In Vivo* Experiments guidelines. Additionally, all  
103 mouse work was approved by the Institutional Animal Care and Use Committee  
104 of The University of Texas MD Anderson Cancer Center. Both female and male  
105 mice were used in this study. Mice were maintained on a 12-hour light/dark cycle  
106 and were provided with sterilized water and either standard rodent chow (Prolab  
107 Isopro RMH 3000 irradiated feed) or a tamoxifen diet (Teklad, TD.130855, 250  
108 mg tamoxifen/kg). Experiments were carried out during the light cycle.

109 *FSF-Kras*<sup>G12D/+</sup>;*P53*<sup>frt/frt</sup> mice were gifts from Dr. David Kirsch (Duke  
110 University)<sup>14, 15</sup>. *Pdx1*<sup>Flp/+</sup> mice were gifts from Dr. Dieter Saur (Technical  
111 University, Munich)<sup>16</sup>. *αSMA*<sup>CreERT2/+</sup> mice were gifts from Dr. Richard Premont  
112 (Case Western Reserve University)<sup>17</sup>. *Hif1α*<sup>fl/fl</sup> (RRID:IMSR\_JAX:007561), *Hif2α*  
113 <sup>fl/fl</sup> (RRID:IMSR\_JAX:008407), *LSL-tdTomato* (RRID:IMSR\_JAX:007914), and  
114 C57BL/6 (RRID:IMSR\_JAX:000664) mice were obtained from Jackson  
115 Laboratories. *FSF-Kras*<sup>G12D/+</sup>;*P53*<sup>frt/frt</sup> mice were bred with *Pdx1*<sup>Flp</sup> mice to  
116 produce *FSF-Kras*<sup>G12D/+</sup>;*P53*<sup>frt/frt</sup>;*Pdx1*<sup>Elp</sup> (KPF) mice. KPF mice were bred with  
117 *αSMA*<sup>CreERT2/+</sup> mice and their progeny was bred with *Hif1α*<sup>fl/fl</sup> and *Hif2α*<sup>fl/fl</sup> mice to  
118 produce KPF CAF-HIF1 and KPF CAF-HIF2 mice, respectively. *LSL-*  
119 *Kras*<sup>G12D/+</sup>;*Trp53*<sup>fl/fl</sup>;*Ptf1a*<sup>Cre/+</sup> (KPC) mice and *EGLN1/2/3*<sup>fl/fl</sup> mice were previously  
120 bred and backcrossed to C57BL/6 mice in our lab<sup>18, 19</sup>. Genotyping was  
121 performed as described previously<sup>20</sup>. Littermate controls were used in all  
122 experiments.

123

## 124 Isolation and Ex Vivo Analysis of Fibroblasts and CAFs

125 tdTomato reporter mice were bred with *αSMA*<sup>CreERT2/+</sup>;*Hif2α*<sup>fl/fl</sup> mice to  
126 produce *αSMA*<sup>CreERT2/+</sup>;*Hif2α*<sup>fl/fl</sup>;*tdTomato*<sup>LSL/LSL</sup> mice. Normal pancreata from the  
127 tdTomato progeny and from *EGLN1/2/3*<sup>fl/fl</sup> mice and whole tumors from KPC mice  
128 were minced and digested with 1 mg/mL Collagenase V (Sigma, C9263-500MG)  
129 for 30 minutes at 37°C and 130 rpm/min followed by digestion with TrypLE  
130 (Thermo Fisher Scientific, 12605036) for 10 minutes at 37°C. Cells were seeded

131 in T175 flasks with DMEM (ATCC, 30-2002) plus 10% (v/v) FBS (MilliporeSigma,  
132 F4135) and 1% Pen/Strep. Upon reaching 70% confluence, cells were passaged  
133 and incubated at 37°C for 30 minutes before the media was refreshed. The  
134 attached cells became enriched for fibroblasts or CAFs after 2-5 passages.  
135 Normal fibroblasts were immortalized with a pBABE-hydro-hTERT lentivirus  
136 (Addgene, #1773).

137 *Hif2α<sup>fl/fl</sup>; αSMA<sup>CreERT2/+</sup>; tdTomato<sup>LSL/LSL</sup>* fibroblasts were treated with  
138 DMSO, 4-hydroxytamoxifen (4-OHT), or Adeno-Cre as a positive control.  
139 Fibroblasts were then genotyped as described previously<sup>20</sup> using the primers  
140 listed in Supplementary Table 3 and imaged with an Olympus FV500 laser  
141 scanning confocal microscope (Olympus USA).

142

### 143 **Histopathology and Immunohistochemistry**

144 Spontaneous PDAC tumors were harvested from KPF-CAF HIF2 wild-type  
145 (WT) and knockout (KO) mice and fixed with 10% neutral buffered formalin,  
146 subjected to ethanol dehydration, washed in Histoclear (National Diagnostics,  
147 HS2001GLL), and embedded in paraffin. Then 5-μm-thick tissue slices were cut,  
148 mounted onto slides, and stained with H&E. Masson's trichrome staining was  
149 performed in the Research Histology Core Lab (RHCL) at MD Anderson.  
150 Histopathologic assessment of H&E staining and fibrosis scoring of trichrome-  
151 stained KPF-CAF HIF2 tumor slides were performed by a pathologist (J. Zhao)  
152 who was blinded to genotype. Immunohistochemistry (IHC) was performed as  
153 previously described<sup>18</sup> using anti-HIF2α (1:200, Abcam Cat# ab199,  
154 RRID:AB\_302739), anti-F4/80 (1:200, Abcam Cat# ab6640, RRID:AB\_1140040),  
155 and anti-FoxP3 (1:200, Abcam Cat# ab20034, RRID:AB\_445284) antibodies.

156

### 157 **Epithelial HIF1 and HIF2 KO**

158 We isolated epithelial PDAC cells from KPF-HIF1<sup>fl/fl</sup> or KPF-HIF2<sup>fl/fl</sup> mice  
159 and induced recombination *ex vivo* via infection with Adeno-Cre or control  
160 Adeno-GFP. Recombined KPF cells were resuspended in PBS and Matrigel in a

161 1:1 ratio and orthotopically implanted into the pancreata of immunocompromised  
162 mice.

163

### 164 **Bulk RNA Sequencing**

165 Frozen tumors from KPF-CAF HIF2 WT and KO mice were homogenized  
166 and RNA was purified using an RNeasy mini kit (QIAGEN, 74106). Library  
167 preparation and sequencing were performed in the Sequencing and Microarray  
168 Facility at MD Anderson. RSEM software package (RRID:SCR\_013027) was  
169 used to quantitate transcript abundance from RNA-seq data<sup>21</sup>. Differential  
170 expression analysis was performed using DESeq2 software package  
171 (RRID:SCR\_015687). Supplementary Table 1 shows the normalized transcript  
172 counts. Gene Set Enrichment Analysis was performed to identify significantly  
173 enriched pathways (FDR < 0.15).

174

### 175 **CAF Conditioned Media Harvest**

176 CAFs isolated from KPC tumors and immortalized normal fibroblasts  
177 isolated from EGLN1/2/3<sup>fl/fl</sup> mice were seeded in DMEM with 10% FBS and 1%  
178 Pen/Strep at 5 x10<sup>5</sup> density in 60-mm cell plates and cultured overnight. The  
179 media was replaced with DMEM containing 0.5% FBS, and cells were transferred  
180 to a hypoxia chamber (InvivoO<sub>2</sub>, Baker Ruskinn) set at 1% O<sub>2</sub> and treated with  
181 increasing concentrations of PT2399 (Peloton Therapeutics/Merck) for 48 hours  
182 <sup>22</sup>. Cell media was collected and centrifuged at 3,000 rpm for 5 minutes, and the  
183 supernatant was stored as conditioned media at -80°C until the experiment.

184

### 185 **Macrophage Transwell Migration Assay**

186 Authenticated RAW 264.7 murine macrophages were purchased from  
187 ATCC (Cat# TIB-71, RRID:CVCL\_0493) and maintained in DMEM with 10% FBS  
188 at 37°C with 5% CO<sub>2</sub>. Cell suspension aliquots were reseeded into new culture  
189 vessels and early passages were used for all experiments. Macrophage  
190 migration was tested in 24-well Transwell permeable plates with 8-μm-pore  
191 polycarbonate membrane inserts (Corning, 3422). Macrophages were

192 resuspended in 100  $\mu$ L of culture media and added to the upper chamber, while  
193 600  $\mu$ L of conditioned media from CAFs or normal fibroblasts was added to the  
194 lower chamber as a chemoattractant. Cells were allowed to migrate through the  
195 membrane insert for 24 hours and nonmigrating macrophages were removed  
196 with a cotton swab. Migrated macrophages were fixed and stained with  
197 hematoxylin for imaging using a light microscope (Leica DMI1). At least 3 random  
198 nonoverlapping fields (10x magnification) were quantified using ImageJ software  
199 (RRID:SCR\_003070).

200

### 201 **Quantitative Real Time-Polymerase Chain Reaction**

202 Frozen tumors from KPF-CAF HIF2 WT and KO mice were homogenized  
203 and RNA was purified using an RNeasy mini kit (QIAGEN, 74106), and reverse  
204 transcription was performed with the QuantiTect reverse transcription kit  
205 (QIAGEN, 205313). Quantitative real-time polymerase chain reaction (qRT-PCR)  
206 was carried out using a QuantiFast SYBR Green PCR kit (QIAGEN, 204056) on  
207 a StepOnePlus real-time PCR system (Applied Biosystems). qRT-PCR analysis  
208 of *Arg1* was also performed on RAW 264.7 murine macrophages treated with the  
209 indicated conditions. Primers are listed in Supplementary Table 3.

210

### 211 **Single-Cell RNA Sequencing**

212 Single-cell suspensions were prepared by mincing KPF CAF-HIF2 WT  
213 and KO tumors, digesting them with 0.5 mg/mL Liberase (Sigma, LIBTH-RO  
214 5401135001) for 30 minutes at 130 rpm, and passing them through a 100- $\mu$ m cell  
215 strainer. Samples were then incubated with Accutase (Sigma, A6964) for 10  
216 minutes at 37°C in a shaker, followed by treatment with ACK lysing buffer  
217 (ThermoFisher, A1049201) to eliminate erythrocytes. Samples were filtered  
218 through a 30- $\mu$ m cell strainer and single cells were resuspended in PBS (GE  
219 Healthcare Life Sciences, SH30256.01) with 0.1% BSA. Cell viability was  
220 measured using Trypan Blue (Bio-Rad, 1450021). Single-cell suspensions were  
221 loaded into a 10x Genomics Chromium instrument to generate gel beads in  
222 emulsion. Approximately 5,000 cells were loaded per channel. Single-cell



223 complementary DNA (cDNA) libraries were prepared using a Chromium Single  
224 Cell 3' Library & Gel Bead kit v2 (10x Genomics, PN-120237) and sequenced  
225 using a NextSeq 500 (Illumina). The mean number of reads per cell was  
226 approximately 25,000 and the median number of genes detected per cell was  
227 approximately 2,000.

228 The raw data were processed using cellranger count (Cell Ranger v2.1.1,  
229 10x Genomics) based on the mm10 mouse reference genome. Subsequent data  
230 analysis was done in R using the Seurat package v3.0 (RRID:SCR\_007322) and  
231 default parameters. Uniform Manifold Approximation and Projection (UMAP)  
232 dimensionality reduction and graph-based clustering of cells were performed,  
233 and clusters were assigned to cell populations using known signature genes.  
234 Supplementary Table 2 shows the genes enriched in each cell population versus  
235 all other cells.

236

### 237 **Immunotherapy Experiments**

238 We obtained KPC cells from Dr. Anirban Maitra that were authenticated by  
239 short tandem repeat profiling and were confirmed to be *Mycoplasma* free by real-  
240 time PCR (CellCheck Mouse 19 Plus, IDEXX Laboratories, Inc.). For the flank  
241 model,  $1 \times 10^6$  KPC cells were resuspended in PBS and Matrigel (Corning) in a  
242 1:1 ratio and subcutaneously implanted into the right flanks of syngeneic 10-  
243 week-old C57BL/6 female mice. Murine  $\alpha$ CTLA4 (BioXCell, BE0164) or isotype  
244 control was administered intraperitoneally (IP) every 3-4 days at 250  $\mu$ g/mouse,  
245 beginning 13 days after implantation (Figure 4G). PT2399 was resuspended in  
246 10% ethanol, 30% PEG400, and 60% methylcellulose/water/Tween 80 and  
247 administered 5 days per week (Monday-Friday), twice daily, at 50 mg/kg via oral  
248 gavage. Treatments lasted 2 weeks, and tumor dimensions were measured with  
249 a caliper to calculate approximate volumes.

250 For the orthotopic model,  $2 \times 10^5$  KPC cells were resuspended in PBS and  
251 Matrigel in a 1:1 ratio and injected into the tail of the pancreas of syngeneic 12-  
252 week-old C57BL/6 male mice. After 2 weeks of recovery, murine  $\alpha$ CTLA4 (clone  
253 9D9, Merck) and murine  $\alpha$ PD1 (muDX400, Merck) or isotype control were

254 administered IP every 4 days at 20  $\mu\text{g}/\text{mouse}$ , 200  $\mu\text{g}/\text{mouse}$ , and 220  
255  $\mu\text{g}/\text{mouse}$ , respectively for 2 weeks. PT2399 was administered 5 days per week,  
256 twice daily for 3 weeks, at 50 mg/kg via oral gavage (Figure 4I). Tumor burden  
257 was monitored by ultrasound. Mice were age-matched but group assignment was  
258 unblinded.

259

## 260 **Statistical Methods**

261 Survival was analyzed by the Kaplan-Meier method and log-rank test.  
262 Student's *t* test was used to analyze parametric data sets and the Mann-Whitney  
263 *U* test was used for non-parametric data sets. All statistical analyses were  
264 performed using GraphPad Prism V.8 (RRID:SCR\_002798), with a significance  
265 level of  $\alpha = 0.05$ .

266

## 267 **Results**

### 268 **Deletion of Stromal HIF2 Delays PDAC Progression and Enhances Survival**

269 We used a dual recombinase system to constrain the deletion of *Hif1 $\alpha$*  or  
270 *Hif2 $\alpha$*  to CAFs within autochthonous PDAC tumors. Mice with FlpO-responsive  
271 alleles of both oncogenic *Kras* (*FSF-Kras<sup>G12D/+</sup>*)<sup>14</sup> and homozygous *Trp53*  
272 (*Trp53<sup>frt/frt</sup>*)<sup>15</sup> were crossed with mice expressing FlpO in pancreatic tissue (*Pdx1-*  
273 *FlpO*)<sup>16</sup> to generate KPF mice. These mice developed spontaneous PDAC over a  
274 timeframe and with a penetrance similar to those in KPC mice (Cre-driven  
275 model), and both models recapitulate human PDAC<sup>16</sup>. KPF mice were  
276 subsequently bred with mice harboring conditional null alleles of *Hif1 $\alpha$*  (*Hif1 $\alpha$ <sup>fl/fl</sup>*)<sup>23</sup>  
277 or *Hif2 $\alpha$*  (*Hif2 $\alpha$ <sup>fl/fl</sup>*)<sup>24</sup>, driven by expression of the *Cre-ER<sup>T2</sup>* transgene under the  
278 control of the  *$\alpha$ -smooth muscle actin* ( *$\alpha$ SMA*, also known as *Acta2*) promoter  
279 which marks CAFs (Figure 1A)<sup>17</sup>. We confirmed deletion of HIF1 or HIF2 through  
280 *ex vivo* analyses of activated fibroblasts isolated from tdTomato reporter mice  
281 (Supplementary Figure 1A-B). Once weaned, mice were fed normal chow or  
282 tamoxifen chow to generate KPF CAF-HIF WT and KPF CAF-HIF KO mice,  
283 respectively (Figure 1B). Mice were screened for tumors weekly by ultrasound.  
284 The median age at tumor onset was 10.3 weeks (range: 7.1–21.1) in both the

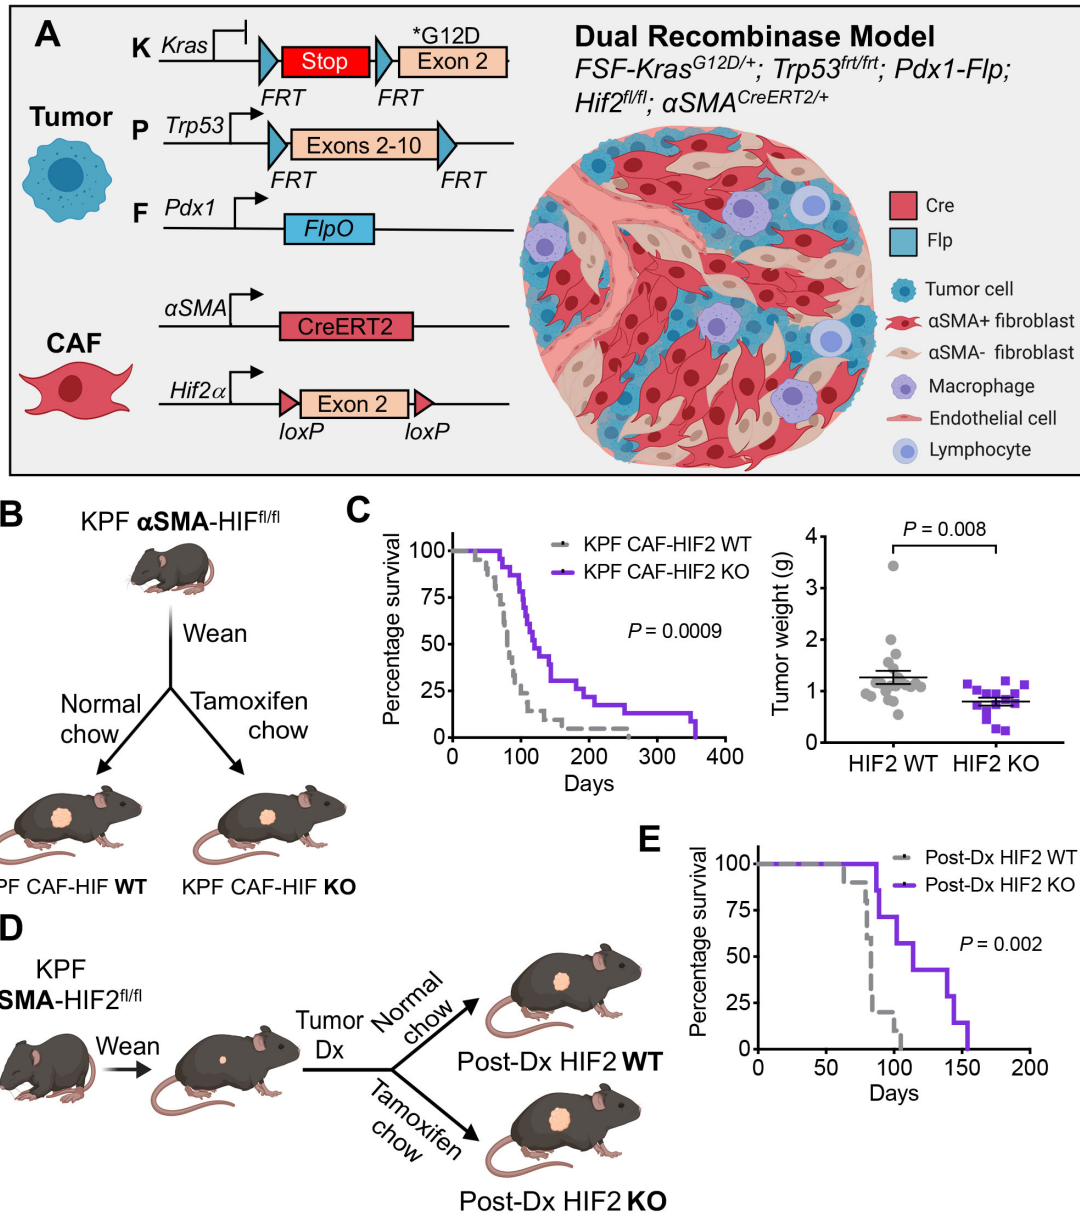

**Figure 1. Deletion of stromal HIF2 delays PDAC progression and enhances survival.** (A) Dual recombinase genetic strategy to develop a PDAC model with HIF1 or HIF2 knockout (KO) in  $\alpha$ SMA<sup>+</sup> cells in a tamoxifen-induced manner using KPF mice. (B) Experimental design to generate KPF CAF-HIF wildtype (WT) control and KPF early CAF-HIF KO mice. (C) *Left:* Kaplan-Meier curves showing percentage survival for KPF CAF-HIF2 WT (n = 21) and KO (n = 23) mice. P, by log-rank test. *Right:* Tumor weights of KPF CAF-HIF2 WT (n = 21) and KO (n = 15) mice. Mean ± SEM; P, by Student's t test. (D) Experimental design to generate post-diagnosis (post-Dx) KPF CAF-HIF2 WT and KO mice. (E) Kaplan-Meier curves showing percentage survival for post-Dx KPF CAF-HIF2 WT (n = 10) and KO (n = 7) mice. P, by log-rank test. See also Supplementary Figures 1-3.

285

286

287

WT and KO groups. Immunohistochemical analysis confirmed a reduction of HIF2 expression in CAFs within KPF tumors (Supplementary Figure 1C).

288 Surprisingly, loss of stromal HIF1 had no effect on tumor growth or survival  
289 (median survival, 91 days for KO versus 100 days for WT; Supplementary Figure  
290 1D-E).

291 In contrast, HIF2 ablation in CAFs significantly decreased tumor growth  
292 and improved survival (median survival, 120 days for KO versus 80 days for WT;  
293  $n = 21\text{-}23$  mice/group, Log-rank  $P = 0.0009$ ; Figure 1C). Histological analyses of  
294 the pancreata revealed well-differentiated PDAC foci in both groups, yet  
295 remarkably, we found no gross or microscopic evidence of tumor tissue in the  
296 sections analyzed from six of the HIF2-depleted mice, suggesting that deletion of  
297 stromal HIF2 may also influence PDAC oncogenesis and/or progression  
298 (Supplementary Figure 2A-C)<sup>13</sup>. Importantly, there were no statistically significant  
299 differences in tumor fibrosis associated with the presence or absence of stromal  
300 HIF2 ( $n = 8\text{-}12$  tumors/group,  $P = 0.0506$ ; Supplementary Figure 2D)<sup>25</sup>.

301 We next assessed how stromal HIF2 deletion after PDAC onset impacted  
302 survival, as this would more closely reflect the timeline of therapeutic HIF2  
303 targeting in patients. We generated another cohort of KPF  $\alpha\text{SMA-HIF2}^{\text{fl/fl}}$  mice  
304 and fed them normal chow or tamoxifen chow after tumors were diagnosed by  
305 ultrasound (Figure 1D). This late abrogation of HIF2 in CAFs still improved  
306 survival by 37.3% compared to the survival of control mice (median, 114 days  
307 versus 83 days;  $P = 0.002$ ; Figure 1E), which was similar to the median survival  
308 of mice receiving tamoxifen chow at weaning. Together, these data suggest that  
309 stromal HIF2, but not HIF1, plays a critical role in PDAC development and  
310 progression.

311 To confirm that this survival advantage was mediated by HIF2 depletion in  
312 CAFs, and not in tumor cells, we isolated cancer cells from KPF tumors with  
313  $Hif1\alpha^{\text{fl/fl}}$  or  $Hif2\alpha^{\text{fl/fl}}$  alleles and induced *ex vivo* recombination by infection with  
314 Cre or control GFP adenovirus. These KPF cells were orthotopically implanted  
315 into the pancreata of immunocompromised mice (Supplementary Figure 3A). We  
316 found that deletion of HIF1 or HIF2 in tumor cells had no impact on tumor growth  
317 (Supplementary Figure 3B-C), confirming cell non-autonomous functions of HIF  
318 in PDAC.

319

## 320 **Stromal HIF2 Regulates Macrophage Recruitment to PDAC Tumors**

321 We performed bulk RNA sequencing (RNA-seq) to understand the  
322 mechanism by which loss of HIF2 in CAFs suppressed tumor growth.  
323 Transcriptomic analysis revealed a stromal HIF2-dependent immune gene  
324 signature with enrichment in multiple pathways related to myeloid/macrophage  
325 biology (Figure 2A, Supplementary Figure 4A-B, and Supplementary Table 1).  
326 Deletion of HIF2 in CAFs led to downregulation of genes involved in macrophage  
327 migration, differentiation, and activation, including *Mmp9*, *Cd74*, *Tgfb1*, and  
328 *Itgam*; these results were validated by qRT-PCR (Figure 2B-C and  
329 Supplementary Figure 4C). We next compared tumor-associated macrophage  
330 (TAM) infiltration by F4/80 IHC and observed significantly fewer TAMs in KPF  
331 CAF-HIF2 KO tumors than in controls ( $n = 5$  tumors/group,  $P = 0.028$ ; Figure  
332 2D). These results suggest that HIF2 signaling in CAFs regulates macrophage  
333 recruitment to PDAC tumors.

334 To evaluate this hypothesis, we established CAF and normal fibroblast  
335 lines from spontaneous pancreatic tumors and normal pancreata, respectively.  
336 Both cell lines were cultured in hypoxia to stabilize HIF2 and to approximate *in*  
337 *vivo* TME conditions, and were then treated with either vehicle or the clinical  
338 HIF2 inhibitor PT2399<sup>22</sup>. We found that conditioned media from hypoxic CAFs  
339 stimulated macrophage migration in a HIF2-dependent fashion (Figures 3A-B).  
340 Stimulation of macrophage migration by CAFs appears to be specific to  
341 fibroblasts reprogrammed in the PDAC TME, as fibroblasts isolated from normal  
342 pancreata lacked the ability to stimulate macrophage migration (Supplementary  
343 Figure 5A). These results strongly suggest that a HIF2 coordinates CAF-TAM  
344 crosstalk in a paracrine fashion.

345

## 346 **Hypoxic CAFs Promote Macrophage M2 Polarization in a HIF2-Dependent** 347 **Paracrine Fashion**

348 Macrophages are functionally classified as either M1, which are classically  
349 activated and pro-inflammatory, or M2, which are alternatively activated during  
350 the resolution phase of inflammation, and thus display an immunosuppressive



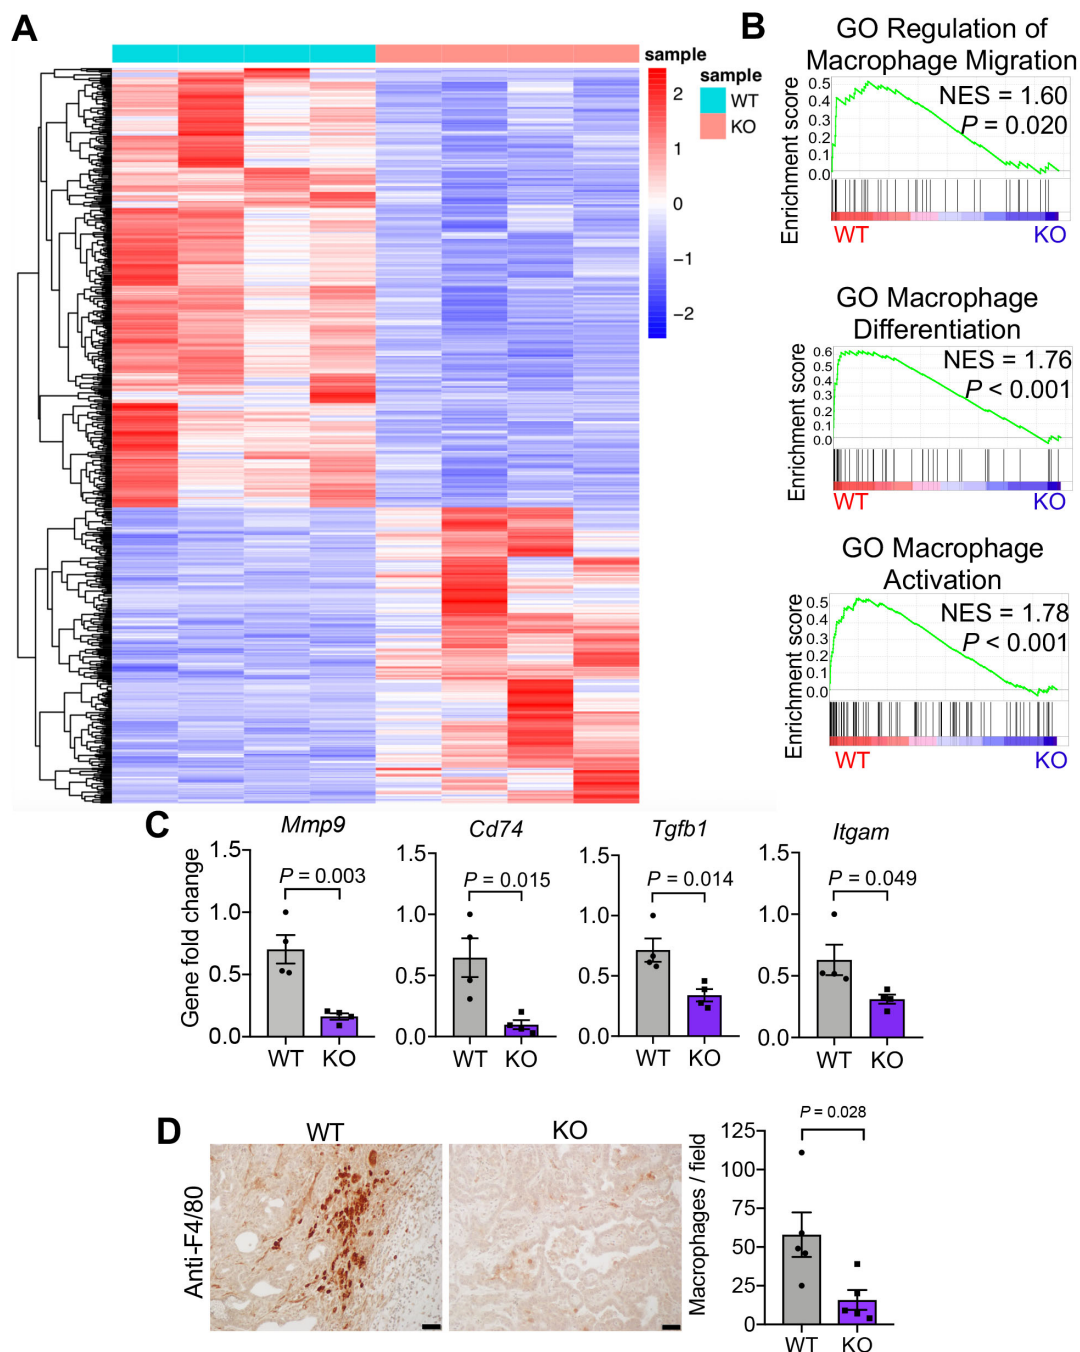

**Figure 2. Stromal HIF2 regulates macrophage recruitment to PDAC tumors.** (A) Heatmap of the top expressed genes using bulk RNA-seq data from KPF CAF-HIF2 tumors (n = 4/group). (B) Gene set enrichment analysis of tumors in (A) correlates CAF-HIF2 function with macrophage migration, differentiation, and activation. GO, gene ontology; NES, normalized enrichment score. (C) qRT-PCR confirmed the downregulation of genes involved in the pathways in (B). (D) *Left*: Representative IHC images of CAF-HIF2 tumors stained for F4/80 (n = 5/group). Scale bar, 50  $\mu$ m. *Right*: Quantification of F4/80+ macrophages per field. All error bars represent mean  $\pm$  SEM and each dot denotes a biological replicate.  $P$ , by Student's  $t$  test. See also Supplementary Figure 4 and Supplementary Table 1.

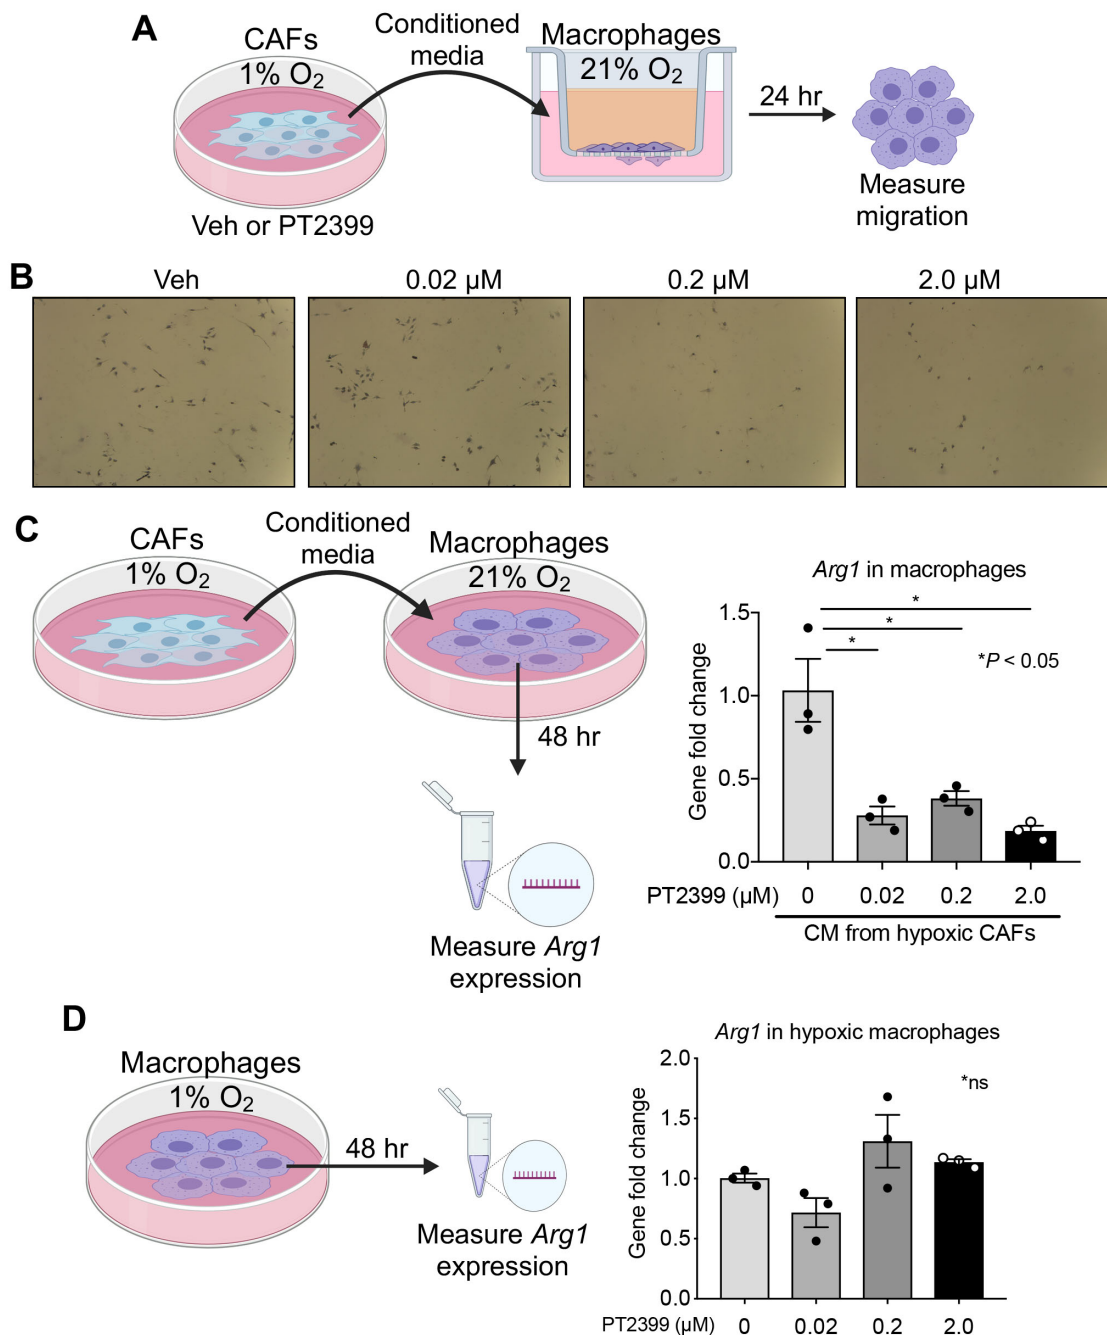

**Figure 3. Hypoxic CAFs promote macrophage M2 polarization in a HIF2-dependent paracrine fashion.** (A) Macrophages were cultured in transwell plates and incubated with conditioned media (CM) collected from hypoxic CAFs treated with vehicle (veh) or PT2399. (B) Representative bright-field images of the transwell assay (10x). (C) Macrophages were incubated with CM collected from hypoxic CAFs treated with veh or PT2399 and *Arg1* expression was measured by qRT-PCR. (D) Hypoxic macrophages were directly treated with veh or PT2399 and *Arg1* expression was measured by qRT-PCR. All error bars represent mean  $\pm$  SEM; *P*, by Student's *t* test. See also Supplementary Figure 5.

351 phenotype<sup>26</sup>. In many cancers, including PDAC, M2 macrophages are associated  
352 with worse outcomes because they promote metastasis and suppress anti-tumor  
353 immune responses via the expression of checkpoint ligands and by induction of  
354 regulatory T cells (Tregs)<sup>26, 27</sup>. CAFs have been linked to M2 repolarization of  
355 TAMs in PDAC<sup>27</sup>, yet the roles of hypoxia and HIF2 in this context remain  
356 unclear.

357 To understand whether HIF2 signaling in CAFs drives macrophage M2  
358 repolarization, we stimulated murine macrophages with conditioned CAF media  
359 and assessed expression of *Arg1*, an M2 polarization marker (Figure 3C). We  
360 found that hypoxia, and therefore HIF2 expression, increased *Arg1* levels by 4-  
361 fold compared to controls (Supplementary Figure 5B). Moreover, HIF2 inhibition  
362 via PT2399 in hypoxic CAFs impaired the ability of conditioned media from these  
363 cells to induce M2 polarization, indicating that the paracrine CAF signal is HIF2-  
364 dependent (Figure 3C). Conditioned media from hypoxic normal pancreatic  
365 fibroblasts failed to induce M2 polarization (Supplementary Figure 5C),  
366 confirming that stimulation of macrophages by CAFs is specific to fibroblasts  
367 reprogrammed in the PDAC TME. Furthermore, direct HIF2 inhibition in  
368 macrophages using PT2399 did not affect M2 polarization (Figure 3D). Taken  
369 together, these findings support the notion that hypoxic CAFs activate TAMs in a  
370 HIF2-dependent paracrine fashion.

371 Vascular endothelial growth factor (VEGF) is a potent immunosuppressive  
372 factor known to induce M2 repolarization in TAMs<sup>28</sup>. Since *Vegf* is a hypoxia-  
373 inducible gene<sup>29</sup>, we measured *Vegf* expression in hypoxic CAFs treated with  
374 PT2399 (Supplementary Figure 5D), and found no differences, indicating that  
375 *Vegf* is not a critical component of the HIF2 regulation of immunosuppression by  
376 CAFs in our model.

377

### 378 **Deletion of Stromal HIF2 Reduces PDAC Immunosuppression**

379 We performed single-cell RNA sequencing (scRNA-seq) to interrogate the  
380 impact of CAF-specific HIF2 signaling on other cells in the PDAC TME. We  
381 analyzed the transcriptomes from 22,635 single cells isolated from three KPF



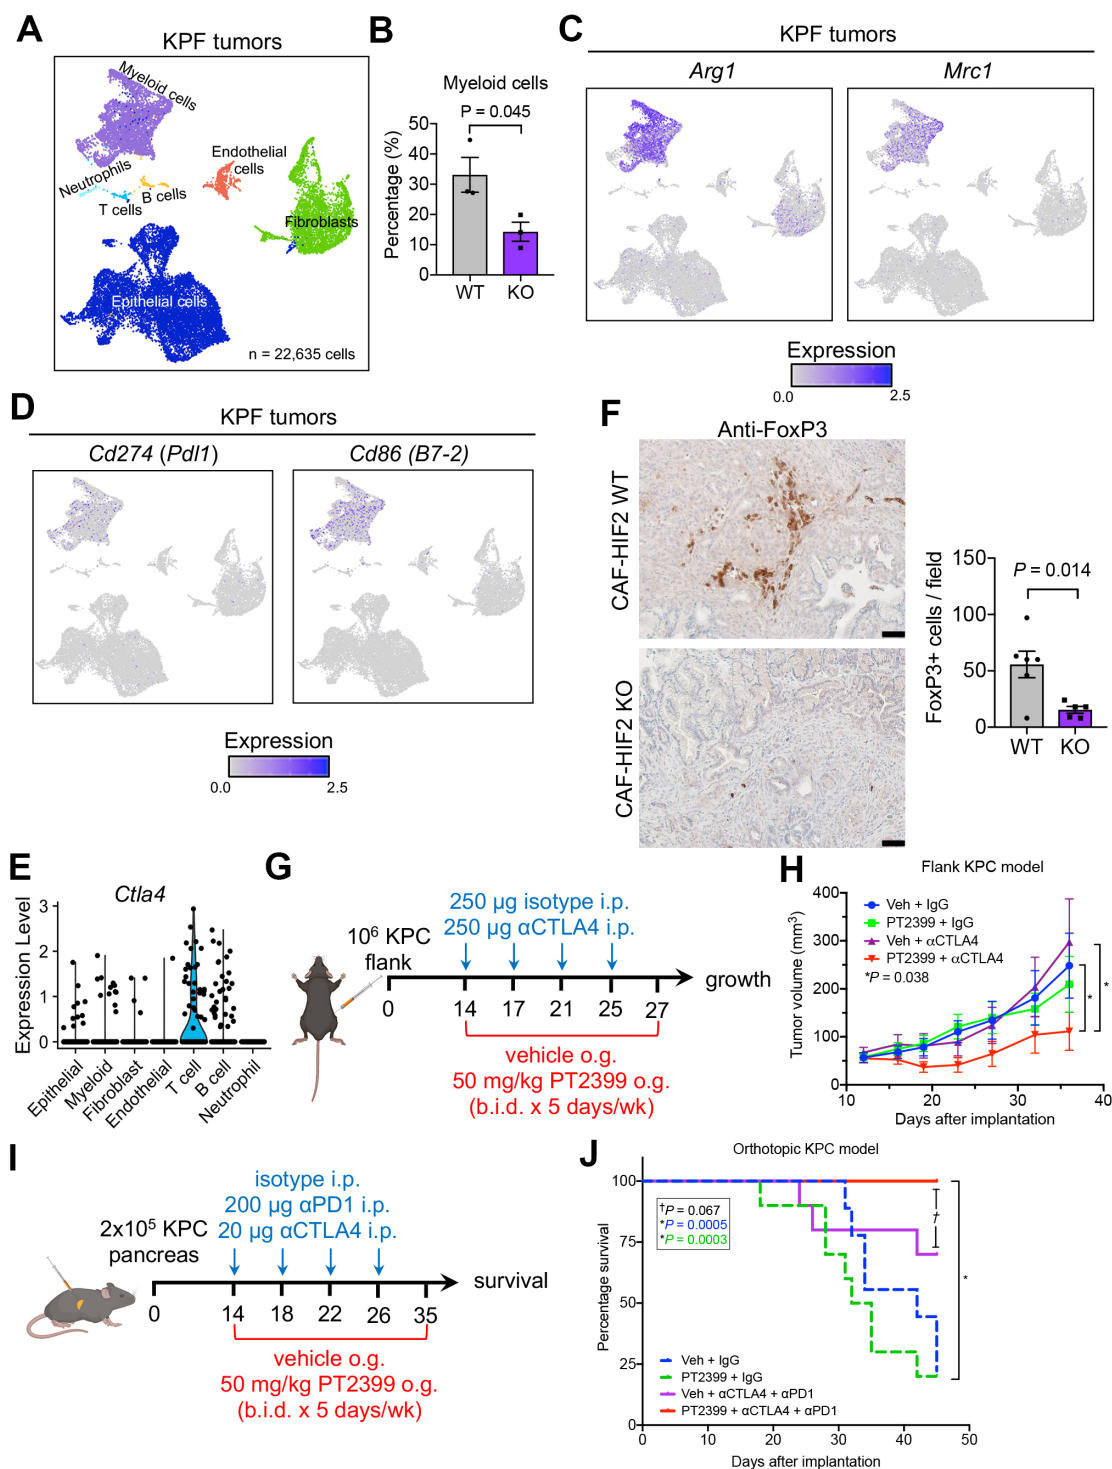

**Figure 4. Inhibition of HIF2 signaling in CAFs reduces PDAC immunosuppression and enhances response to checkpoint immunotherapy.** (A) UMAP of scRNA-seq analysis of 22,635 cells isolated from KPF CAF-HIF2 WT tumors (10,703 cells; n = 3 mice) and KPF CAF-HIF2 KO tumors (11,932 cells; n = 3 mice). Cell types were identified through graph-based clustering followed by manual annotation using marker genes. (B) Percentage of myeloid cells in each tumor. (C) M2-polarized TAMs were identified within the myeloid cell population via expression of

*Arg1* and *Mrc1*. (D) Immunosuppressive TAMs were identified within the myeloid cell population via expression of *Cd274* (*Pdl1*) and *Cd86* (*B7-2*). (E) Violin plots showing findings on scRNA-seq analysis of *Ctla4* in KPF CAF-HIF2 WT and KO tumors in all identified cell types. (F) *Left*: Representative IHC images of CAF-HIF2 WT and KO tumors stained for FoxP3 ( $n = 5-6/\text{group}$ ); scale bars, 50  $\mu\text{m}$ . *Right*: Quantification of FoxP3+ Tregs per field. (G) Schematic for administration of PT2399 +  $\alpha\text{CTLA4}$  in a syngeneic flank KPC model. i.p., intraperitoneal; o.g., oral gavage; b.i.d., *bid in die* (twice a day). (H) Tumor growth curve from (A) ( $n = 10/\text{group}$ ). Veh, vehicle; *P*, by Mann–Whitney *U* test. (I) Schematic for administration of PT2399 +  $\alpha\text{CTLA4}/\alpha\text{PD1}$  in a syngeneic orthotopic KPC model. (J) Kaplan-Meier curves showing percentage survival for (C) ( $n = 10/\text{group}$ ); *P*, by log-rank test. All error bars represent mean  $\pm$  SEM; *P*, by Student's *t* test unless otherwise noted. See also Supplementary Figure 6 and Supplementary Table 2.

382

383 CAF-HIF2 WT tumors (10,703 cells) and three KPF CAF-HIF2 KO tumors  
384 (11,932 cells). Graph-based clustering of cells after UMAP dimensionality  
385 reduction identified 32 clusters that were assigned to seven major cell types  
386 using signature genes (Figure 4A, Supplementary Figure 6A-C, and  
387 Supplementary Table 2). All of the cell populations identified were represented in  
388 both experimental groups and in all six mice, with 52.9% of the cells analyzed  
389 being identified as epithelial/tumor cells, 22.6% as myeloid cells, 19.8% as  
390 fibroblasts, and the remaining cells as endothelial cells, B cells, neutrophils, and  
391 T cells (Figure 4A and Supplementary Figure 6D).

392 Quantification of the relative proportions of each cell type within tumors  
393 showed that HIF2 deletion in  $\alpha\text{SMA}+$  CAFs did not affect the total number of  
394 fibroblasts within tumors (Supplementary Figure S6). Single-cell analyses were  
395 largely concordant with the bulk RNA-seq and IHC data, showing that CAF-HIF2  
396 KO tumors had significantly fewer myeloid cells than CAF-HIF2 WT tumors  
397 (14.3% versus 33.1%;  $n = 3$  tumors/group,  $P = 0.045$ ; Figure 2B-D and 4B).  
398 Further interrogation of this population revealed higher expression of *Cd11b*  
399 (*Itgam*), *Cd68*, *Adgre1* (F4/80), *Arg1*, and *Mrc1*, indicating a predominance of  
400 M2-polarized TAMs (Figure 4C, Supplementary Figure 6E, and Supplementary  
401 Table 2). A substantial proportion of these TAMs expressed the  
402 immunosuppressive checkpoint ligands *Cd274* (*Pdl1*, ligand for PD-1) and *Cd86*  
403 (ligand for CTLA-4; Figure 4D). Single-cell analysis also showed higher  
404 expression of *Ctla4*, *Foxp3*, and *Pdcd1* (*Pd1*) in a subset of T cells (Figures 4E

405 and Supplementary Figure 6E), indicating the presence of Tregs in KPF tumors.  
406 Moreover, IHC staining of tumor sections for the Treg marker FoxP3 showed that  
407 CAF-HIF2 KO tumors had significantly fewer Tregs than CAF-HIF2 WT tumors ( $n$   
408 = 5-6 tumors/group,  $P = 0.014$ ; Figure 4F). These data strongly suggest that  
409 deletion of HIF2 in CAFs reduces the PDAC immunosuppressive landscape.

410

### 411 **Inhibition of HIF2 Signaling Enhances PDAC's Response to Immunotherapy**

412 PDAC is highly resistant to immunotherapy<sup>1</sup>, but recent studies have  
413 suggested that targeting non-redundant pathways by combining anti-CTLA4 and  
414 anti-PD1 therapies may overcome the inherent TME immunosuppression<sup>30</sup>.  
415 Since HIF2 deletion reduced the number of immunosuppressive M2-polarized  
416 TAMs and Tregs, we reasoned that PT2399 might improve response to  
417 checkpoint immunotherapy. To test this hypothesis, we implanted KPC cells  
418 subcutaneously into syngeneic C57BL/6 mice and assigned them to one of four  
419 treatments: vehicle plus IgG control, vehicle plus anti-CTLA4 antibody ( $\alpha$ CTLA4),  
420 PT2399 plus IgG, or PT2399 plus  $\alpha$ CTLA4 (Figure 4G). We found that the  
421 combination of PT2399 with  $\alpha$ CTLA4 significantly slowed tumor growth ( $n = 10$   
422 mice/group,  $P = 0.038$ ), while treatment with either drug alone had no discernible  
423 effect (Figure 4H).

424 We next implanted KPC cells orthotopically into syngeneic C57BL/6 mice  
425 to test whether HIF2 inhibition enhanced response to dual checkpoint blockade  
426 (DCB) with  $\alpha$ CTLA4 and anti-PD1 antibody ( $\alpha$ PD1). Mice were assigned to one  
427 of four treatments: vehicle plus IgG, vehicle plus DCB, PT2399 plus IgG, or  
428 PT2399 plus DCB, with the goal to assess 60-day survival (Figure 4I). The  
429 experiment was prematurely terminated due to institutional mandates related to  
430 COVID-19, yet the survival rate at 45 days in mice that received combined  
431 PT2399 and DCB was 100%, significantly better than the survival rate in the  
432 groups treated with IgG control ( $n = 10$  mice/group,  $P \leq 0.0005$ ), and trending  
433 toward improved survival compared to mice treated with DCB and vehicle ( $n = 10$   
434 mice/group,  $P = 0.067$ ; Figure 4J). Taken together, these results suggest that

435 HIF2 inhibition might enhance anti-tumor immune responses and improve  
436 survival.

437

## 438 **Discussion**

439 Our study addresses a long-standing knowledge gap about the relative  
440 roles of HIF signaling in the PDAC microenvironment. Here we show that CAF-  
441 specific expression of HIF2, but not HIF1, drives a subset of signals that  
442 increases the presence of immunosuppressive cells like TAMs and Tregs in a  
443 HIF2-dependent fashion. Furthermore, genetic or pharmacologic inhibition of  
444 HIF2 improved survival in spontaneous and syngeneic mouse models.

445 Our study identifies HIF2 signaling in CAFs as a critical component of  
446 hypoxia-related immunosuppression in pancreatic cancer. We demonstrate that  
447 HIF2 signaling orchestrates immunosuppression within pancreatic tumors by  
448 shifting the cellular composition of the TME, rather than by altering fibrosis, which  
449 was unchanged in our model. We observed more TAMs and Tregs in tumors  
450 from mice with intact HIF2 function compared to mice with HIF2 deletion in CAFs.  
451 These data contrast with findings from a previous study in which depletion of  
452  $\alpha$ SMA<sup>+</sup> CAFs reduced fibrosis and increased Tregs and cancer progression<sup>8</sup>.  
453 These phenotypic differences are most likely explained by the different  
454 approaches of the two studies: ours targeted CAF functionality under hypoxia,  
455 while the former study ablated CAFs altogether. We note that we used our dual  
456 recombinase system to interrogate only  $\alpha$ SMA<sup>+</sup> CAFs. Recent studies have  
457 shown tumor-supportive roles for other CAF subtypes that do not express  
458  $\alpha$ SMA<sup>31</sup>. These other subtypes could be studied in future experiments using  
459 different Cre drivers, such as *Fap* or *Fsp1*, to address the dynamic relationships  
460 between CAF populations.

461 While hypoxia, and therefore HIF signaling, affects nearly the entire  
462 pancreatic tumor, our data suggest that the detrimental effects of tumor hypoxia  
463 are mediated by HIF2 in CAFs, which has not been previously reported. Given  
464 that CAFs are the main component and producers of tumor stroma, and that  
465 years of accumulating evidence point to hypoxia having a role in PDAC's

466 aggressiveness and resistance to therapies, our data advances the field's  
467 understanding of how the hypoxic stroma interplays to promote a cold, immune-  
468 hostile microenvironment, that is able to overcome immunotherapy. We  
469 demonstrate that hypoxic CAFs, reprogrammed in the TME, could stimulate the  
470 migration and polarization of macrophages in a HIF2-dependent fashion when  
471 cultured *ex vivo*. Importantly, fibroblasts isolated from normal pancreata had no  
472 discernible influence on macrophage function. It is not yet known if this novel  
473 crosstalk is mediated by a single soluble factor or by a combination of growth  
474 factors<sup>27</sup>, metabolites<sup>32</sup>, and/or exosomes<sup>33</sup>. The effects of tumor hypoxia on  
475 erratic angiogenesis have been postulated as an underlying mechanism of  
476 ineffective tumor infiltration in PDAC<sup>28</sup>. Yet, this mechanism is not consistent with  
477 our model, since pharmacological inhibition of HIF2 in CAFs did not alter their  
478 expression of *Vegf*, the main driver of tumor angiogenesis<sup>28, 29</sup>. Other groups  
479 have postulated roles for cytokines like CSF1, which enhances the recruitment  
480 and polarization of macrophages<sup>27</sup>. A potential role of CSF1 is consistent with our  
481 sequencing data which demonstrate reduced expression of *Csf1r* in CAF-HIF2  
482 KO tumors. Although studies in carcinogen-induced inflammatory cancer models  
483 showed that HIF2 directly regulates macrophage migration and polarization by  
484 inducing CSF1R<sup>34</sup>, our data suggest that in pancreatic cancer, HIF2 regulates  
485 macrophages indirectly through CAFs. Moreover, our data does not rule out the  
486 contribution of HIF2-dependent metabolic<sup>32</sup> or epigenetic<sup>35</sup> changes within CAFs.

487 We demonstrated with single-cell resolution that M2-polarized TAMs were  
488 a major source of CD86 and PD-L1 in the TME, whereas their respective  
489 receptors were expressed in a subset of T cells. Thus, we infer that these TAMs  
490 may be partially responsible for the subsequent reprogramming of effector T cells  
491 in the pancreatic TME. Deletion of CAF-HIF2 correlated with reduced TAM  
492 density and improved survival from pancreatic cancer in mice, similar to the  
493 findings in several clinical reports<sup>26, 27</sup>.

494 Furthermore, we show that the effects of HIF2 in the TME can be  
495 modulated with the clinical HIF2 inhibitor PT2399, which enhanced immune  
496 responses in syngeneic models. This drug is already in advanced trials for renal

497 cell carcinoma<sup>22</sup> and could potentially be repurposed to treat pancreatic cancer  
498 as part of a future clinical trial. In summary, this study shows the importance of  
499 CAF-specific HIF2 signaling in regulating the PDAC immune landscape and  
500 highlights potential novel therapeutic avenues.

501

## 502 **Disclosures**

503 C.M.T. is on the medical advisory board of Accuray and is a paid  
504 consultant for Xerient Pharma and Phebra Pty, Ltd. The other authors declare no  
505 potential conflicts of interest.

506

## 507 **Grant Support**

508 C.M.T. was supported by funding from the National Institutes of Health  
509 (NIH) under award number R01CA227517-01A1 and from the Cancer Prevention  
510 & Research Institute of Texas (CPRIT) grant RR140012, the V Foundation  
511 (V2015-22), the Sidney Kimmel Foundation, a Sabin Family Foundation  
512 Fellowship, the Reaumont Family Foundation, the Mark Foundation, Childress  
513 Family Foundation, the McNair Family Foundation, and generous philanthropic  
514 contributions to The University of Texas MD Anderson Moon Shots Program.

515 C.J.G.G. was supported by the National Institute of Diabetes, Digestive and  
516 Kidney Diseases of the NIH under award number F31DK121384 and by the  
517 NIH/NCI under award number U54CA096300/297. This work was also supported  
518 by the NIH/NCI Cancer Center Support Grants (CCSG) P30CA016672, which  
519 supports MDACC's Small Animal Imaging Facility, Sequencing and Microarray  
520 Facility, and Research Histology Core Laboratory.

521

## 522 **Acknowledgements**

523 We would like to acknowledge Dr. David Kirsch (Duke) and Dr. Dieter  
524 Saur for their generous gift of KPF breeders for our colony and Dr. Richard  
525 Premont (Case Western) for providing the  $\alpha$ SMA<sup>CreERT2</sup> mice. Experimental  
526 design figures were made using BioRender.com. We thank the MD Anderson  
527 Research Library Editing Services for their input.



528 **Author Contributions**

529 Conceptualization, Y.H. and C.M.T.; Data Curation, Y.H., C.J.G.G., D.L.,  
530 and N.D.N.; Formal Analysis, Y.H., C.J.G.G., N.D.N., J.J.L., and V.B.; Funding  
531 Acquisition, C.M.T.; Investigation, Y.H., C.J.G.G., D.L., N.D.N., T.N.F., J.Z., M.Y.,  
532 A.M.D., J.L.P., A.D., and J.M.M.; Methodology, Y.H. and C.M.T.; Project  
533 Administration, Y.H., C.J.G.G., and C.M.T.; Resources, D.S., A.M., and C.M.T.;  
534 Software, Y.H., N.D.N., J.J.L., and V.B.; Supervision, C.M.T.; Validation, Y.H.,  
535 C.J.G.G., and C.M.T.; Visualization, Y.H., C.J.G.G., D.L., N.D.N., J.J.L., N.R.F.,  
536 M.C.T., and C.M.T.; Writing – Original Draft, C.J.G.G., D.L., N.D.N., and C.M.T.;  
537 Writing – Review & Editing, C.J.G.G., D.L., M.C.T., and C.M.T.

538

539 **References**

- 540 1. Lee JS, Ruppin E. Multiomics Prediction of Response Rates to Therapies  
541 to Inhibit Programmed Cell Death 1 and Programmed Cell Death 1 Ligand  
542 1. *JAMA Oncology* 2019;5:1614-1618.
- 543 2. Tjomsland V, Niklasson L, Sandström P, et al. The Desmoplastic Stroma  
544 Plays an Essential Role in the Accumulation and Modulation of Infiltrated  
545 Immune Cells in Pancreatic Adenocarcinoma. *Clinical and Developmental*  
546 *Immunology* 2011;2011:212810.
- 547 3. Chauhan VP, Boucher Y, Ferrone CR, et al. Compression of pancreatic  
548 tumor blood vessels by hyaluronan is caused by solid stress and not  
549 interstitial fluid pressure. *Cancer Cell* 2014;26:14-5.
- 550 4. Koong AC, Mehta VK, Le QT, et al. Pancreatic tumors show high levels of  
551 hypoxia. *Int J Radiat Oncol Biol Phys* 2000;48:919-22.
- 552 5. Provenzano PP, Hingorani SR. Hyaluronan, fluid pressure, and stromal  
553 resistance in pancreas cancer. *British Journal of Cancer* 2013;108:1-8.
- 554 6. Whittle MC, Hingorani SR. Fibroblasts in Pancreatic Ductal  
555 Adenocarcinoma: Biological Mechanisms and Therapeutic Targets.  
556 *Gastroenterology* 2019;156:2085-2096.
- 557 7. De Jesus-Acosta A, Sugar EA, O'Dwyer PJ, et al. Phase 2 study of  
558 vismodegib, a hedgehog inhibitor, combined with gemcitabine and nab-

- 559 paclitaxel in patients with untreated metastatic pancreatic  
560 adenocarcinoma. *British Journal of Cancer* 2020;122:498-505.
- 561 8. Ozdemir BC, Pentcheva-Hoang T, Carstens JL, et al. Depletion of  
562 carcinoma-associated fibroblasts and fibrosis induces immunosuppression  
563 and accelerates pancreas cancer with reduced survival. *Cancer Cell*  
564 2014;25:719-34.
- 565 9. Hakim N, Patel R, Devoe C, et al. Why HALO 301 Failed and Implications  
566 for Treatment of Pancreatic Cancer. *Pancreas (Fairfax, Va.)* 2019;3:e1-e4.
- 567 10. Brown JM, Giaccia AJ. The Unique Physiology of Solid Tumors:  
568 Opportunities (and Problems) for Cancer Therapy. *Cancer Research*  
569 1998;58:1408.
- 570 11. Colbert LE, Fisher SB, Balci S, et al. High nuclear hypoxia-inducible factor  
571 1 alpha expression is a predictor of distant recurrence in patients with  
572 resected pancreatic adenocarcinoma. *Int J Radiat Oncol Biol Phys*  
573 2015;91:631-9.
- 574 12. Lee KE, Spata M, Bayne LJ, et al. Hif1a Deletion Reveals Pro-Neoplastic  
575 Function of B Cells in Pancreatic Neoplasia. *Cancer Discov* 2016;6:256-  
576 69.
- 577 13. Criscimanna A, Duan L-J, Rhodes JA, et al. PanIN-Specific Regulation of  
578 Wnt Signaling by HIF2 $\alpha$  during Early Pancreatic Tumorigenesis. *Cancer*  
579 *Research* 2013;73:4781.
- 580 14. Young NP, Crowley D, Jacks T. Uncoupling Cancer Mutations Reveals  
581 Critical Timing of p53 Loss in Sarcomagenesis. *Cancer Research*  
582 2011;71:4040.
- 583 15. Lee C-L, Moding EJ, Huang X, et al. Generation of primary tumors with  
584 Flp recombinase in FRT-flanked p53 mice. *Disease Models &*  
585 *Mechanisms* 2012;5:397.
- 586 16. Schonhuber N, Seidler B, Schuck K, et al. A next-generation dual-  
587 recombinase system for time- and host-specific targeting of pancreatic  
588 cancer. *Nat Med* 2014;20:1340-1347.



- 589 17. Wendling O, Bornert JM, Chambon P, et al. Efficient temporally-controlled  
590 targeted mutagenesis in smooth muscle cells of the adult mouse. *Genesis*  
591 2009;47:14-8.
- 592 18. Fujimoto TN, Colbert LE, Huang Y, et al. Selective EGLN Inhibition  
593 Enables Ablative Radiotherapy and Improves Survival in Unresectable  
594 Pancreatic Cancer. *Cancer Res* 2019;79:2327-2338.
- 595 19. Taniguchi CM, Miao YR, Diep AN, et al. PHD Inhibition Mitigates and  
596 Protects Against Radiation-Induced Gastrointestinal Toxicity via HIF2.  
597 *Science Translational Medicine* 2014;6:236ra64.
- 598 20. Bardeesy N, Aguirre AJ, Chu GC, et al. Both p16(Ink4a) and the p19(Arf)-  
599 p53 pathway constrain progression of pancreatic adenocarcinoma in the  
600 mouse. *Proc Natl Acad Sci U S A* 2006;103:5947-52.
- 601 21. Li B, Dewey CN. RSEM: accurate transcript quantification from RNA-Seq  
602 data with or without a reference genome. *BMC Bioinformatics*  
603 2011;12:323.
- 604 22. Chen W, Hill H, Christie A, et al. Targeting renal cell carcinoma with a HIF-  
605 2 antagonist. *Nature* 2016;539:112-117.
- 606 23. Ryan HE, Poloni M, McNulty W, et al. Hypoxia-inducible Factor-1 $\alpha$  Is a  
607 Positive Factor in Solid Tumor Growth. *Cancer Research* 2000;60:4010.
- 608 24. Gruber M, Hu C-J, Johnson RS, et al. Acute postnatal ablation of Hif-2 $\alpha$   
609 results in anemia. *Proceedings of the National Academy of Sciences*  
610 2007;104:2301.
- 611 25. Spivak-Kroizman TR, Hostetter G, Posner R, et al. Hypoxia Triggers  
612 Hedgehog-Mediated Tumor–Stromal Interactions in Pancreatic Cancer.  
613 *Cancer Research* 2013;73:3235.
- 614 26. Noy R, Pollard JW. Tumor-associated macrophages: from mechanisms to  
615 therapy. *Immunity* 2014;41:49-61.
- 616 27. Zhang A, Qian Y, Ye Z, et al. Cancer-associated fibroblasts promote M2  
617 polarization of macrophages in pancreatic ductal adenocarcinoma. *Cancer*  
618 *Med* 2017;6:463-470.

- 619 28. Lee WS, Yang H, Chon HJ, et al. Combination of anti-angiogenic therapy  
620 and immune checkpoint blockade normalizes vascular-immune crosstalk  
621 to potentiate cancer immunity. *Experimental & Molecular Medicine*  
622 2020;52:1475-1485.
- 623 29. Choueiri TK, Kaelin WG. Targeting the HIF2–VEGF axis in renal cell  
624 carcinoma. *Nature Medicine* 2020;26:1519-1530.
- 625 30. Twyman-Saint Victor C, Rech AJ, Maity A, et al. Radiation and dual  
626 checkpoint blockade activate non-redundant immune mechanisms in  
627 cancer. *Nature* 2015;520:373-377.
- 628 31. Elyada E, Bolisetty M, Laise P, et al. Cross-Species Single-Cell Analysis  
629 of Pancreatic Ductal Adenocarcinoma Reveals Antigen-Presenting  
630 Cancer-Associated Fibroblasts. *Cancer Discovery* 2019;9:1102.
- 631 32. Sousa CM, Biancur DE, Wang X, et al. Pancreatic stellate cells support  
632 tumour metabolism through autophagic alanine secretion. *Nature*  
633 2016;536:479-483.
- 634 33. Zhao H, Yang L, Baddour J, et al. Tumor microenvironment derived  
635 exosomes pleiotropically modulate cancer cell metabolism. *eLife*  
636 2016;5:e10250.
- 637 34. Imtiyaz HZ, Williams EP, Hickey MM, et al. Hypoxia-inducible factor 2 $\alpha$   
638 regulates macrophage function in mouse models of acute and tumor  
639 inflammation. *The Journal of Clinical Investigation* 2010;120:2699-2714.
- 640 35. Sherman MH, Yu RT, Tseng TW, et al. Stromal cues regulate the  
641 pancreatic cancer epigenome and metabolome. *Proceedings of the*  
642 *National Academy of Sciences* 2017;114:1129.
- 643
